# Supplementary material for: Ancient DNA from Hunter-Gatherer and Farmer Groups from Northern Spain Supports a Random Dispersion Model for the Neolithic Expansion into Europe
Source: PLoS One. 2012 Apr 25;7(4):e34417. doi: 10.1371/journal.pone.0034417 (PMC3340892; doi:10.1371/journal.pone.0034417)
Supplement: Table S5 — Results of FST analysis. FST values (upper the diagonal) and p-values with standard deviation (p±de) (under the diagonal) based on haplogroup frequencies (P<0.0001, in gray). See abbreviations in Figure 2. (XLS) [file pone.0034417.s005.xls]

## Sheet: Hoja1
	HG_CANT	HG_SCA	HG_CE	NEO_CAS	NEO_PAT	NEO_FR	NEO_CAT	NEO_CE	SJAPL	PR	Longar	Basques	Cant._F	Ib_ Pen.	SCA	NW	Mdw	NC	Alp	MdC	Iraq	Syria	Palestina	Turkey	Kurdistan	Armenia	N Caucasus
HG_CANT	0	0.2772	0.2521	-0.0872	-0.1253	0.1111	-0.0049	0.1103	-0.0213	0.008	-0.0044	-0.0448	-0.0613	-0.0206	-0.0337	-0.0085	-0.0309	-0.0185	-0.0404	-0.024	-0.0054	-0.03268	-0.02591	-0.0215	-0.0207	-0.0376	-0.048
HG_SCA	0.0303±0.0051	0	-0.0396	0.322	0.0542	0.3091	0.4055	0.328	0.3389	0.3632	0.3955	0.2673	0.311	0.3522	0.3431	0.3226	0.3414	0.3251	0.3116	0.3055	0.242	0.24065	0.22676	0.2308	0.2242	0.2374	0.2093
HG_CE	0.0449±0.0066	0.999±0.0002	0	0.312	0.047	0.274	0.3889	0.3152	0.3306	0.3512	0.3829	0.2615	0.3128	0.3464	0.3353	0.314	0.3343	0.3163	0.3038	0.2949	0.2265	0.22781	0.21322	0.21737	0.2111	0.2234	0.1963
NEO_CAS	0.8994±0.0093	0.0000±0.0000	0.0000±0.0000	0	0.1021	0.1687	0.0039	0.0979	-0.0082	0.0018	-0.0066	0.002	-0.0103	0.0068	-0.0016	0.0002	-0.0035	0.0023	-0.0062	-0.0022	0.0296	0.01194	0.01517	0.01646	0.0234	0.0057	0.0147
NEO_PAT	0.6143±0.0153	0.0000±0.0000	0.0000±0.0000	0.5439±0.0155	0	0.1704	0.179	0.212	0.1404	0.1729	0.1838	0.1141	0.1267	0.1821	0.169	0.1681	0.1658	0.1658	0.1419	0.1479	0.1107	0.09299	0.09198	0.10089	0.0856	0.0944	0.0712
NEO_FR	0.2529±0.0161	0.0000±0.0002	0.0000±0.0002	0.0322±0.0044	0.0879±0.0032	0	0.0869	0.0133	0.1556	0.1181	0.1672	0.1363	0.1787	0.2331	0.2207	0.161	0.2045	0.1784	0.1751	0.1482	0.0933	0.07957	0.06836	0.07194	0.0677	0.0864	0.0646
NEO_CAT	0.4443±0.0117	0.0000±0.0000	0.0000±0.0000	0.3682±0.0161	0.5654±0.0144	0.3203±0.0161	0	0.0101	-0.0004	-0.0394	0.0128	0.0026	-0.0151	0.0117	0.0067	-0.0174	-0.0011	-0.0176	-0.0153	-0.0195	-0.0012	-0.01675	-0.01541	-0.02351	-0.0076	-0.0132	-0.0058
NEO_CE	0.0517±0.0060	0.0000±0.0000	0.0000±0.0000	0.0000±0.0000	0.0000±0.0000	0.1816±0.0117	0.3232±0.0157	0	0.0623	0.0275	0.0678	0.0831	0.1059	0.1417	0.1364	0.0807	0.1127	0.0961	0.0976	0.0729	0.0485	0.03913	0.03673	0.03836	0.0314	0.0499	0.0563
SJAPL	0.5596±0.0169	0.0000±0.0000	0.0000±0.0000	0.5713±0.0145	0.4463±0.0199	0.1768±0.0115	0.4268±0.0165	0.00684±0.0027	0	-0.0244	-0.0085	0.0206	0.0105	0.036	0.027	0.0065	0.0191	0.0217	0.0091	0.0112	0.0236	0.01117	0.00891	0.01665	0.0104	0.0109	0.0286
PR	0.5225±0.0143	0.0000±0.0000	0.0000±0.0000	0.4599±0.0142	0.4541±0.0146	0.4805±0.0148	0.8379±0.0115	0.07910±0.0092	0.7803±0.0122	0	-0.0134	0.0144	0.0063	0.0306	0.0198	-0.0066	0.0129	0.0045	0.0011	-0.0052	0.0132	0.00083	-0.00433	-0.00115	0.0087	-0.0017	0.0133
Longar	0.4678±0.0183	0.0000±0.0000	0.0000±0.0000	0.4609±0.0141	0.6123±0.0154	0.0264±0.0050	0.2715±0.0124	0.00586±0.0026	0.5352±0.0141	0.5742±0.0150	0	0.0127	0.0226	0.0326	0.0193	0.0009	0.0127	0.01313	0.0136	0.0029	0.0511	0.0304	0.02361	0.0277	0.0375	0.0169	0.0287
Basque	0.7021±0.0137	0.0000±0.0000	0.0000±0.0000	0.3994±0.0200	0.4717±0.0167	0.0264±0.0042	0.3349±0.0116	0.0000±0.0000	0.0664±0.0064	0.1289±0.0092	0.1494±0.0111	0	0.0092	0.0179	0.0178	0.0105	0.0103	0.0101	0.0095	0.0077	0.04236	0.01891	0.0241	0.0211	0.0344	0.0171	0.0173
Cant_F	0.6172±0.0154	0.0000±0.0000	0.0000±0.0000	0.2695±0.0141	0.6016±0.0125	0.0039±0.0019	0.2490±0.0147	0.0000±0.0000	0.0693±0.0083	0.0801±0.0094	0.0615±0.0080	0.6367±0.0137	0	0.0017	-0.0022	0.0032	-0.0026	-0.0008	-0.0077	0.0017	0.0359	0.0182	0.0236	0.02056	0.0371	0.0159	0.0235
Ib_Pen	0.3975±0.0167	0.0000±0.0000	0.0000±0.0000	0.084±0.0089	0.6367±0.0137	0.0019±0.0014	0.2178±0.0123	0.0000±0.0000	0.0273±0.0053	0.0459±0.0050	0.0391±0.0057	0.0000±0.0000	0.0137±0.0044	0	0.0029	0.0109	0.0003	0.0061	0.0049	0.0133	0.0713	0.0495	0.0608	0.05394	0.0779	0.0461	0.0572
SCA	0.5312±0.0167	0.0000±0.0000	0.0000±0.0000	0.3281±0.0162	0.6143±0.0129	0.0029±0.0016	0.2803±0.0151	0.0000±0.0000	0.0566±0.0066	0.0859±0.0102	0.0791±0.0091	0.0000±0.0000	0.0156±0.0044	0.0029±0.0016	0	0.0076	-0.001	0.0032	0.0008	0.008	0.066	0.044	0.0498	0.0459	0.0698	0.0364	0.0469
NW	0.3916±0.0152	0.0000±0.0000	0.0000±0.0000	0.3008±0.0160	0.6641±0.0170	0.0078±0.0024	0.6641±0.0156	0.0000±0.0000	0.2178±0.0111	0.6113±0.0146	0.3721±0.0148	0.0000±0.0000	0.0000±0.0000	0.0000±0.0000	0.0000±0.0000	0	0.0027	0.0013	0.0013	0.0001	0.0431	0.02444	0.0269	0.02393	0.0411	0.0195	0.0308
Mdw	0.5410±0.0121	0.0000±0.0000	0.0000±0.0000	0.3291±0.0130	0.7715±0.0132	0.0039±0.0019	0.4033±0.0157	0.0000±0.0000	0.0947±0.0091	0.1572±0.0124	0.1367±0.0138	0.0059±0.0026	0.4424±0.0179	0.2607±0.0139	0.6191±0.0145	0.1045±0.0070	0	-0.00002	-0.0014	0.003	0.0532	0.03247	0.0396	0.03546	0.0539	0.02836	0.03871
NC	0.4756±0.0188	0.0000±0.0000	0.0000±0.0000	0.2646±0.0139	0.6435±0.0147	0.0059±0.0022	0.6592±0.0179	0.0000±0.0000	0.0605±0.0076	0.2500±0.0089	0.1309±0.0135	0.0000±0.0000	0.0001±0.0010	0.0000±0.0000	0.0029±0.0016	0.1113±0.0081	0.3848±0.0143	0	-0.0005	0.0006	0.0474	0.0272	0.0321	0.0271	0.0491	0.0226	0.0313
Alp	0.6347±0.0148	0.0000±0.0000	0.0000±0.0000	0.5957±0.0164	0.5918±0.0140	0.0048±0.0025	0.6162±0.0148	0.0000±0.0000	0.2197±0.0127	0.3516±0.0158	0.1465±0.0111	0.0029±0.0016	0.0967±0.0095	0.0166±0.0034	0.2324±0.0131	0.2051±0.0151	0.6084±0.0137	0.3691±0.0157	0	0.0004	0.0378	0.01963	0.0243	0.0216	0.0385	0.0167	0.0259
MdC	0.5293±0.0158	0.0000±0.0000	0.0000±0.0000	0.4463±0.0168	0.6416±0.0134	0.0185±0.0046	0.6973±0.0089	0.0000±0.0000	0.1631±0.0142	0.5391±0.0165	0.333±0.0151	0.0029±0.0016	0.0029±0.0016	0.0000±0.0000	0.0019±0.0014	0.3564±0.0156	0.1035±0.0090	0.5859±0.0193	0.4981±0.0136	0	0.0292	0.01238	0.0162	0.0136	0.0299	0.0088	0.0179
NE	0.8223±0.0115	0.0000±0.0000	0.0000±0.0000	0.7295±0.0151	0.5391±0.0116	0.0166±0.0042	0.5273±0.0144	0.0000±0.0000	0.1396±0.0099	0.2139±0.0142	0.1064±0.0101	0.001±0.0010	0.0000±0.0000	0.0000±0.0000	0.0000±0.0000	0.0000±0.0000	0.0439±0.0074	0.1113±0.0114	0.2598±0.0103	0.3193±0.0148	0.0378	0.0164	0.0206	0.01883	0.0302	0.0144	0.018
SE	0.7256±0.0178	0.0000±0.0000	0.0000±0.0000	0.6152±0.0180	0.4541±0.0113	0.0225±0.0042	0.7265±0.0131	0.0000±0.0000	0.2051±0.0112	0.4131±0.0152	0.1533±0.0098	0.0273±0.0045	0.0001±0.0010	0.0000±0.0000	0.0000±0.0000	0.0176±0.0044	0.0264±0.0054	0.0566±0.0073	0.0000±0.0000	0.3779±0.0169	0.0181	0.0015	0.0056	0.0043	0.0148	0.0014	0.0058
MdE	0.5527±0.0172	0.0000±0.0000	0.0000±0.0000	0.4394±0.0140	0.6123±0.0132	0.0166±0.0037	0.8310±0.0132	0.0000±0.0000	0.1777±0.0143	0.4512±0.0148	0.1055±0.0096	0.0029±0.0016	0.0127±0.0034	0.0029±0.0016	0.0264±0.0061	0.1641±0.0099	0.1298±0.0119	0.0117±0.0030	0.0225±0.0051	0.2275±0.0135	0.0248	0.0101	0.0173	0.013	0.0293	0.0104	0.0215
Iraq	0.4531±0.0165	0.0000±0.0000	0.0000±0.0000	0.0762±0.0089	0.1787±0.0102	0.0498±0.0072	0.4102±0.0147	0.0000±0.0000	0.0674±0.0077	0.1826±0.0114	0.0117±0.0033	0.0000±0.0000	0.0000±0.0000	0.0000±0.0000	0.0000±0.0000	0.0000±0.0000	0.0000±0.0000	0.0000±0.0000	0.0000±0.0000	0.0000±0.0000	0	-0.0078	0.0023	0.00385	-0.00132	0.00424	0.01641
Syria	0.6426±0.0151	0.0000±0.0000	0.0000±0.0000	0.2988±0.0135	0.2656±0.0151	0.0664±0.0067	0.6465±0.0139	0.0000±0.0000	0.2119±0.0101	0.4112±0.0180	0.043±0.0067	0.0185±0.0046	0.0000±0.0000	0.0000±0.0000	0.0000±0.0000	0.0019±0.0014	0.0039±0.0019	0.0003±0.0016	0.001±0.0010	0.0215±0.0038	0.0039±0.0019	0	-0.0076	-0.0063	-0.0092	-0.0061	0.0006
Palestina	0.5488±0.0145	0.0000±0.0000	0.0000±0.0000	0.2734±0.0185	0.1894±0.0110	0.0957±0.0097	0.6230±0.0136	0.0000±0.0000	0.2031±0.0137	0.5273±0.0119	0.0527±0.0085	0.0001±0.0010	0.0000±0.0000	0.0000±0.0000	0.0000±0.0000	0.0000±0.0000	0.0000±0.0000	0.0000±0.0000	0.0000±0.0000	0.0029±0.0016	0.0674±0.0078	0.8769±0.0086	0	-0.0048	-0.0053	-0.0043	-0.0004
Turkey	0.5195±0.0201	0.0000±0.0000	0.0000±0.0000	0.1904±0.0122	0.2148±0.0148	0.0742±0.0106	0.7852±0.0144	0.0000±0.0000	0.0996±0.0088	0.4316±0.0133	0.0371±0.0061	0.0000±0.0000	0.0000±0.0000	0.0000±0.0000	0.0000±0.0000	0.0000±0.0000	0.0000±0.0000	0.0000±0.0000	0.0000±0.0000	0.0000±0.0000	0.0039±0.0019	0.2949±0.0155	0.8818±0.0108	0	-0.0009	-0.0027	0.0007
Kurdistan	0.57617±0.0156	0.0000±0.0000	0.0000±0.0000	0.4082±0.0152	0.3281±0.0139	0.0537±0.0059	0.5537±0.0141	0.0000±0.0000	0.1855±0.0124	0.4746±0.0175	0.1152±0.0107	0.0001±0.0010	0.0000±0.0000	0.0000±0.0000	0.0000±0.0000	0.0000±0.0000	0.0000±0.0000	0.001±0.0010	0.0019±0.0014	0.0019±0.0014	0.0107±0.0030	0.1631±0.0117	0.9033±0.0077	0.9492±0.0067	0	0.0017	0.0073
Armenia	0.6885±0.0126	0.0000±0.0000	0.00000±0.0000	0.2978±0.0148	0.1738±0.0122	0.1094±0.0092	0.4561±0.0163	0.0019±0.0014	0.041±0.0071	0.1787±0.0137	0.0498±0.0078	0.0000±0.0000	0.0000±0.0000	0.0000±0.0000	0.0000±0.0000	0.0000±0.0000	0.0000±0.0000	0.0000±0.0000	0.0000±0.0000	0.0030±0.0019	0.0078±0.0024	0.4882±0.0181	0.8418±0.0115	0.7139±0.0099	0.4512±0.0128	0	-0.0002
N Caucasus	0.5381±0.0149	0.0000±0.0000	0.00000±0.0000	0.1777±0.0109	0.1924±0.0139	0.0889±0.0094	0.5361±0.0162	0.0147±0.0031	0.2129±0.0129	0.2539±0.0101	0.0381±0.0053	0.0001±0.0010	0.0000±0.0000	0.0000±0.0000	0.0000±0.0000	0.0001±0.0010	0.0000±0.0000	0.0000±0.0000	0.0000±0.0000	0.0000±0.0000	0.0293±0.0068	0.1582±0.0134	0.8525±0.0119	0.8477±0.0099	0.7959±0.0119	0.3066±0.0127	0
